# Supplementary material
Source: publisher figshare collection journal article supplement (https://f1000.figshare.com/ndownloader/files/1306002)
Supplement: Supplementary file 1 [file 1306002]

0	0.05	0.1	0.5	0	0.05	0.1	0.5
12	15	22	16	22	19	1	6
24	16	18	15	18	17	0	0
18	12	15	14	16	10	8	5
0	24	12	15	22	0	0	0
10	22	19	15	9	5	5	6
